# Supplementary material for: A facile and green synthesis of MIL-100(Fe) with high-yield and its catalytic performance
Source: Royal Society of Chemistry journal article supplement (doi:10.1039/c7nj02975f), 2017-01-01
Supplement: c7nj02975f1.pdf [file c7nj02975f1.pdf]

## Supporting Information

### **Facile and green synthesis of MIL-100(Fe) with high-yield and its catalytic performance**

Le Han<sup>a</sup>, Hui Qi<sup>b</sup>, Dan Zhang<sup>a</sup>, Gan Ye<sup>a</sup>, Ying Mao<sup>a</sup>, Wei Zhou<sup>c</sup>, Changmin Hou<sup>d</sup>,  
Yinyong Sun<sup>a,\*</sup>, Wei Xu<sup>d</sup>

*<sup>a</sup>MIT Key Laboratory of Critical Materials Technology for New Energy Conversion  
and Storage, School of Chemistry and Chemical Engineering, Harbin Institute of  
Technology, Harbin, 150001, China*

*<sup>b</sup>The Second Hospital of Jilin University, Changchun, 130041, China*

*<sup>c</sup>Key Laboratory of Functional Inorganic Material Chemistry, Heilongjiang  
University, Ministry of Education, Harbin, 150080, China*

*<sup>d</sup>State Key Lab of Inorganic Synthesis and Preparative Chemistry, College of  
Chemistry, Jilin University, Changchun, 130012, China*

\*To whom correspondence should be addressed.

Tel: 86 451 86413708

E-mail: [yysun@hit.edu.cn](mailto:yysun@hit.edu.cn)

Table S1. Textural properties and product yield of MIL-100(Fe) prepared under various conditions.

| Samples <sup>a</sup>   | S <sub>BET</sub> (m <sup>2</sup> /g) | V <sub>Total</sub> (cm <sup>3</sup> /g) | Product yield (%) |
|------------------------|--------------------------------------|-----------------------------------------|-------------------|
| MIL-100(Fe)-1.0-4-160  | 1649                                 | 0.85                                    | 91                |
| MIL-100(Fe)-1.5-4-160  | 1940                                 | 0.96                                    | 93                |
| MIL-100(Fe)-2.0-4-160  | 1538                                 | 0.83                                    | 91                |
| MIL-100(Fe)-1.5-4-100  | 1317                                 | 0.66                                    | 92                |
| MIL-100(Fe)-1.5-4-130  | 1864                                 | 0.88                                    | 89                |
| MIL-100(Fe)-1.5-1-160  | 1656                                 | 0.79                                    | 87                |
| MIL-100(Fe)-1.5-2-160  | 1780                                 | 0.88                                    | 81                |
| MIL-100(Fe)-1.5-8-160  | 1849                                 | 0.93                                    | 91                |
| MIL-100(Fe)-1.5-12-160 | 1796                                 | 0.91                                    | 89                |
| MIL-100(Fe)-1.5-14-160 | 1708                                 | 0.83                                    | 81                |

Table S2. Elemental content in MIL-100(Fe)-S and MIL-100(Fe)-H.

| Samples       | Fe (wt/%) <sup>a</sup> | C (wt/%) <sup>a</sup> | O (wt/%) <sup>a</sup> |
|---------------|------------------------|-----------------------|-----------------------|
| MIL-100(Fe)-S | 10.8                   | 53.7                  | 35.5                  |
| MIL-100(Fe)-H | 9.4                    | 62.2                  | 28.4                  |

<sup>a</sup> Measured by EDX.

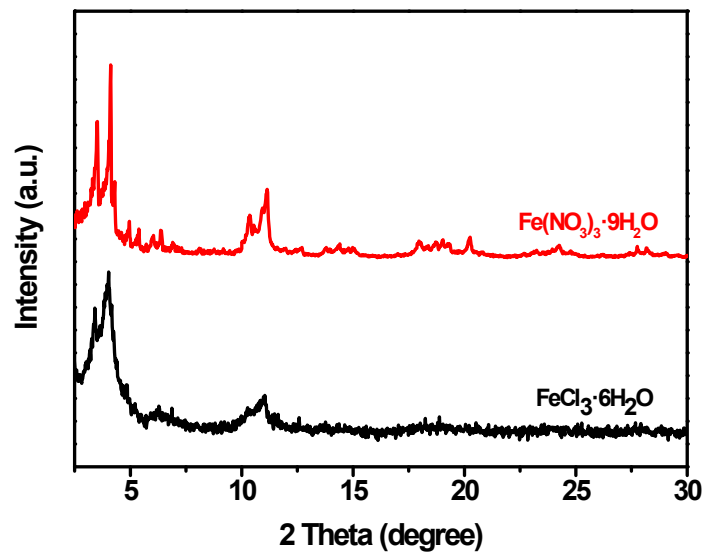

Figure S1. XRD patterns of MIL-100(Fe) prepared by using different iron precursors.

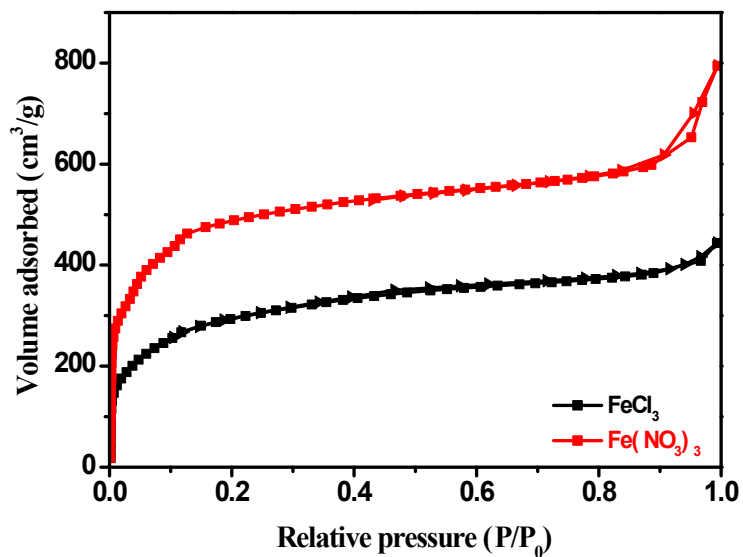

Figure S2.  $\text{N}_2$  sorption isotherms of MIL-100(Fe) prepared by using different iron precursors.

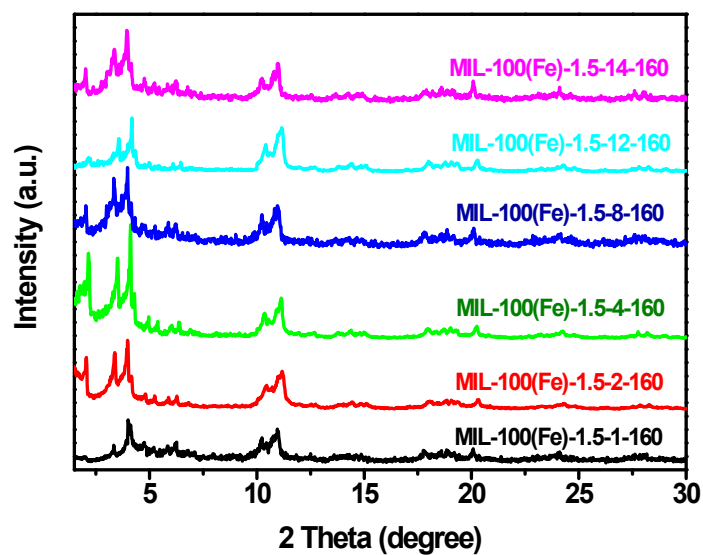

Figure S3. XRD patterns of MIL-100(Fe) prepared for different crystallization time.

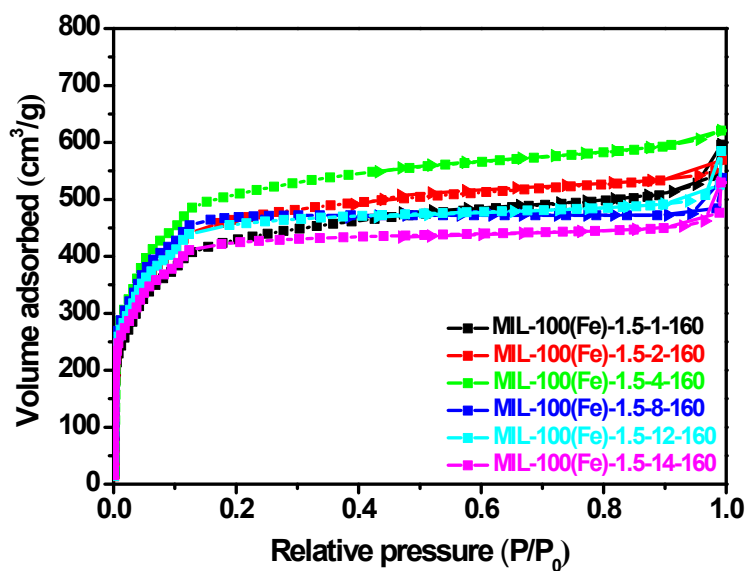

Figure S4. N<sub>2</sub> sorption isotherms of MIL-100(Fe) prepared for different crystallization time.

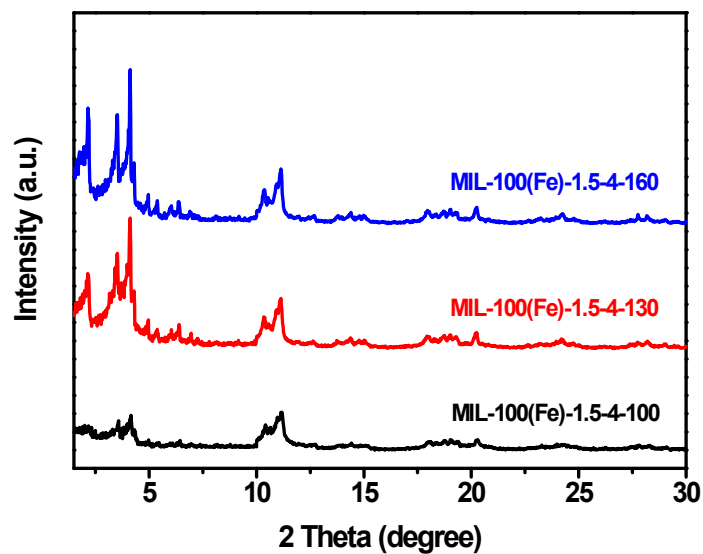

Figure S5. XRD patterns of MIL-100(Fe) prepared at different crystallization temperatures.

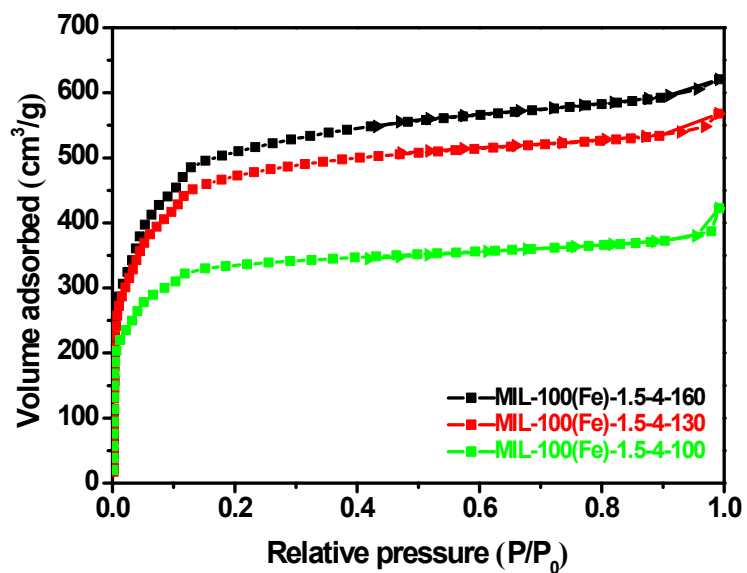

Figure S6.  $N_2$  sorption isotherms of MIL-100(Fe) prepared at different crystallization temperatures.

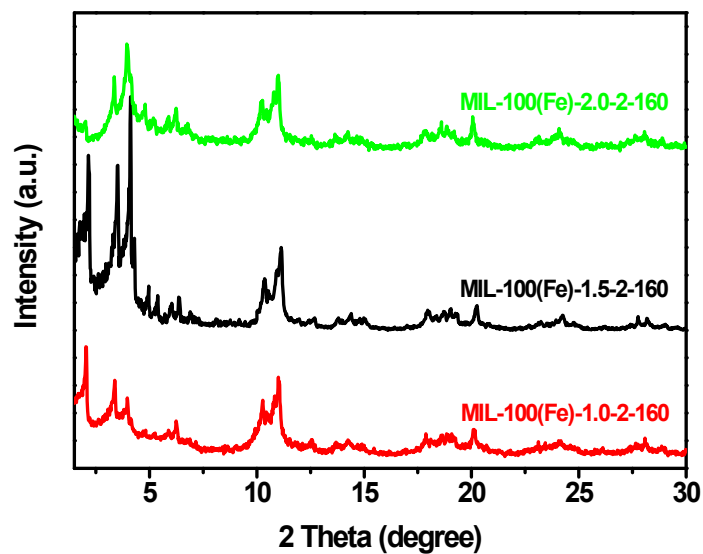

Figure S7. XRD patterns of MIL-100(Fe) prepared at different Fe/BTC molar ratios.

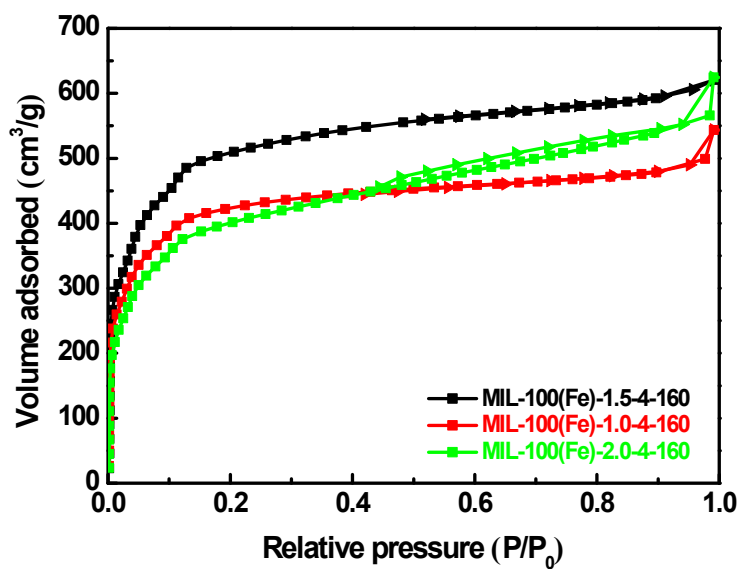

Figure S8. N<sub>2</sub> sorption isotherms of MIL-100(Fe) prepared at different Fe/BTC molar ratios.

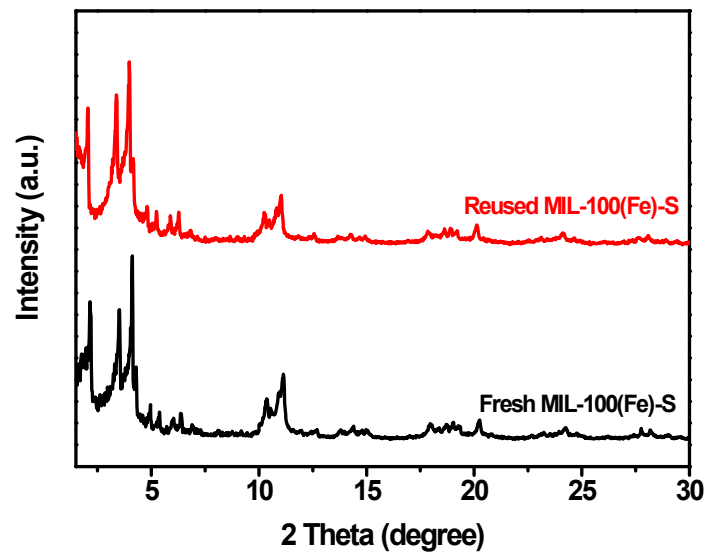

Figure S9. XRD patterns of fresh and reused MIL-100(Fe)-S.

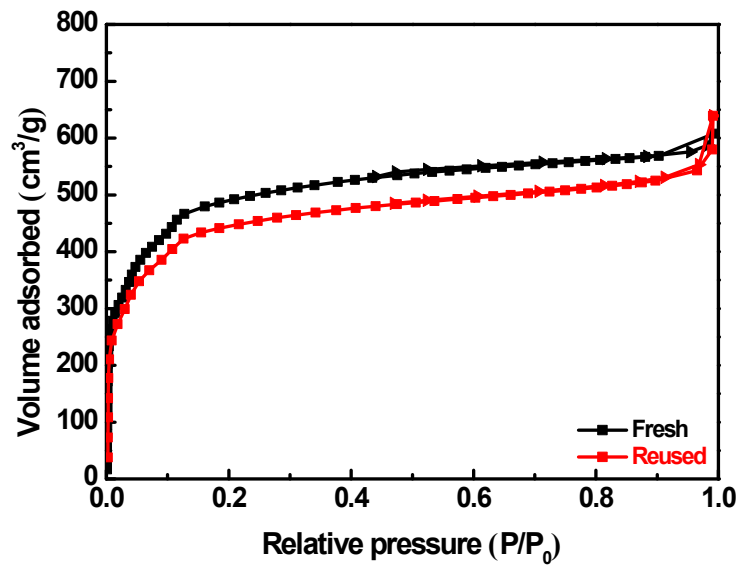

Figure S10. N<sub>2</sub> sorption isotherms of fresh and reused MIL-100(Fe)-S.
